# Supplementary material for: ESIPT-active 8-hydroxyquinoline chemosensor for highly selective detection of diethyl chlorophosphate and molecular logic gate applications
Source: Royal Society of Chemistry journal article supplement (doi:10.1039/d6ra01529h), 2026-05-11
Supplement: d6ra01529h1.pdf [file d6ra01529h1.pdf]

## Supporting Information

### **ESIPT-Active 8-Hydroxyquinoline Chemosensor for Highly Selective Detection of Diethyl Chlorophosphate and Molecular Logic Gate Applications**

Aastha Palta<sup>a</sup>, Gulshan Kumar<sup>b</sup>, Kamaldeep Paul<sup>c</sup> and Vijay Luxami<sup>c\*</sup>

*<sup>a</sup>University Centre for Research and Development, Chandigarh University, Mohali-140413, India*

*<sup>b</sup>Department of Chemistry, Banasthali University, Banasthali Newai, 304022 Rajasthan, India*

*<sup>c</sup>Department of Chemistry and Biochemistry, Thapar Institute of Engineering and Technology, Patiala-147001, India*

Email: [vluxami@thapar.edu](mailto:vluxami@thapar.edu)

## **Table of Contents:**

**Figure S1:**  $^1\text{H}$  NMR spectrum of **HQHBI**.

**Figure S2:**  $^{13}\text{C}$  NMR spectrum of **HQHBI**.

**Figure S3:** HRMS spectrum of **HQHBI**.

**Figure S4:** Comparison of calculated absorption spectra at different functional with experimental absorption spectra peak.

**Figure S5:** Plot for the determination of lowest detection limit of **HQHBI** ( $20\ \mu\text{M}$ ) with DCP in  $\text{H}_2\text{O}$ :  $\text{CH}_3\text{CN}$ , 1:1 [v/v].

**Figure S6:** Benesi-Hildebrand plot for determination of binding constant of **HQHBI** ( $20\ \mu\text{M}$ ) with DCP in  $\text{H}_2\text{O}$ :  $\text{CH}_3\text{CN}$ , 1:1 [v/v].

**Figure S7:** Job's Plot for **HQHBI** ( $20\ \mu\text{M}$ ) binding with DCP ( $20\ \mu\text{M}$ ) in  $\text{H}_2\text{O}$ :  $\text{CH}_3\text{CN}$ , 1:1 [v/v].

**Table S1:** Comparison with previously reported DCP sensors.

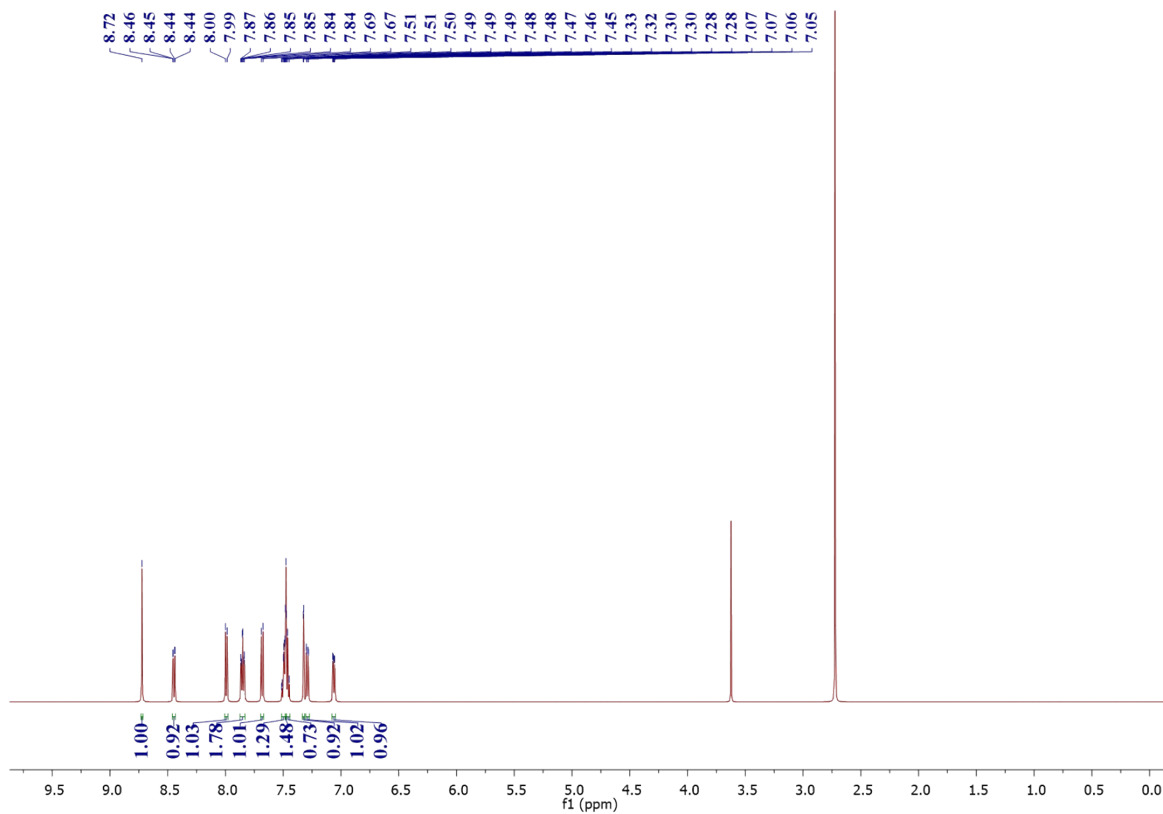

**Figure S1:**  $^1\text{H}$  NMR spectrum of HQHBI.

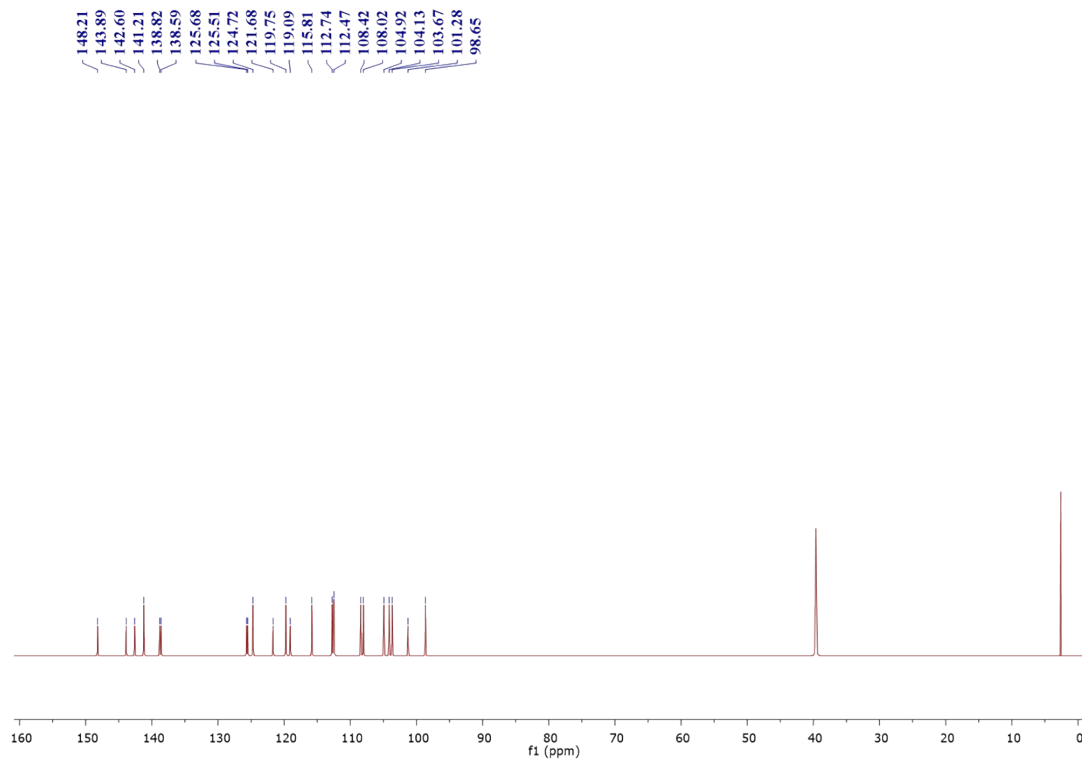

**Figure S2:**  $^{13}\text{C}$  NMR spectrum of HQHBI.

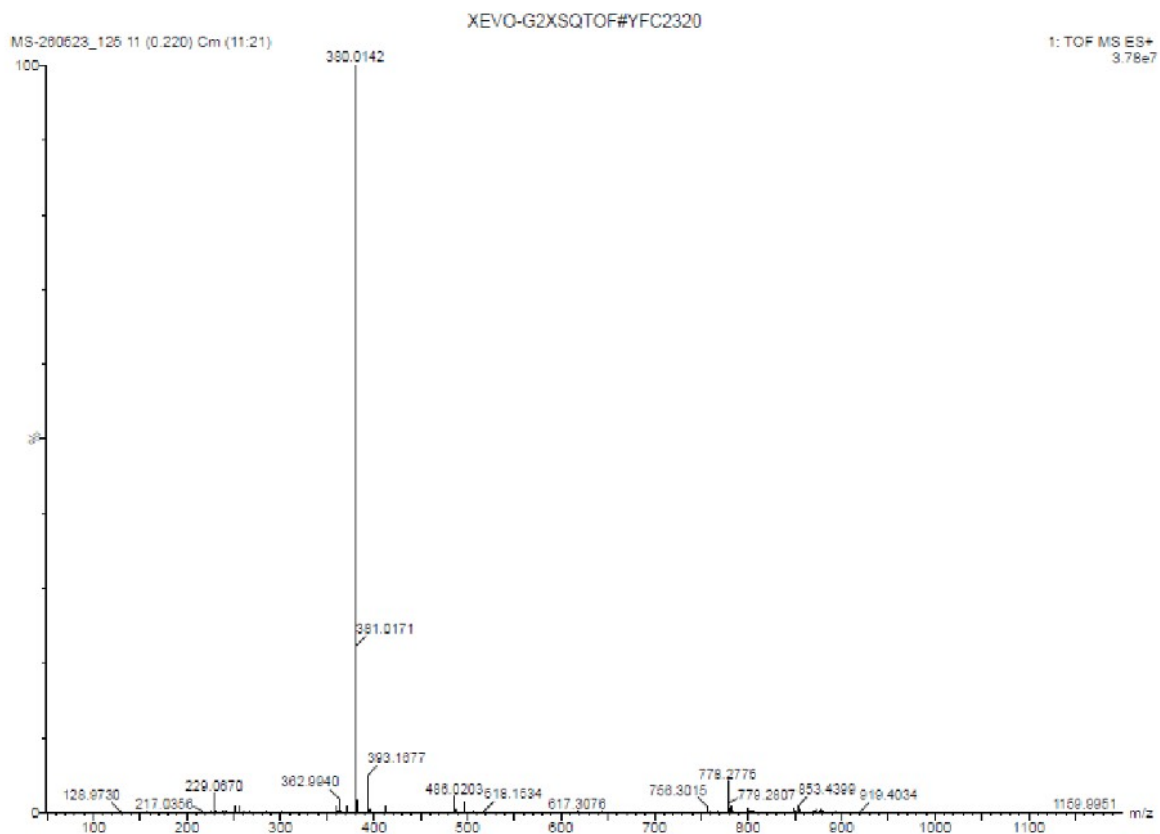

Figure S3: HRMS spectrum of HQHBI.

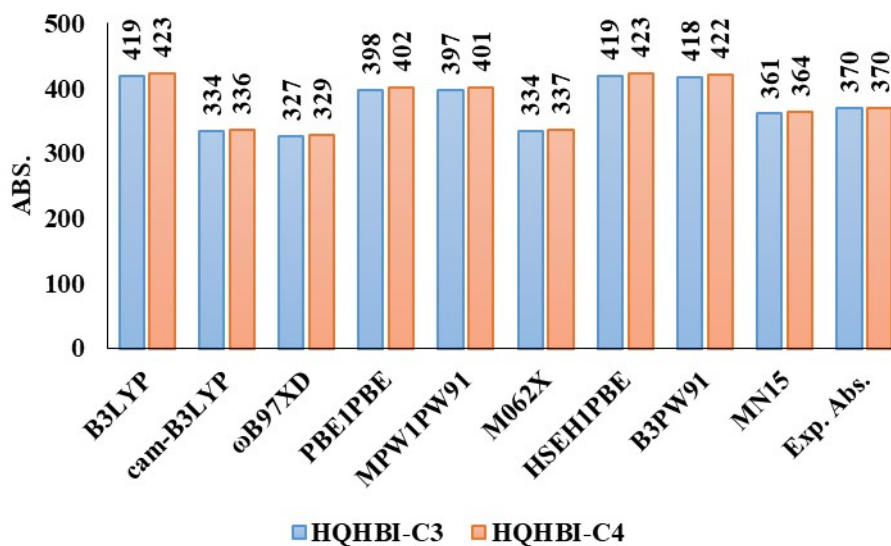

Figure S4: Comparison of calculated absorption spectra at different functional with experimental absorption spectra peak.

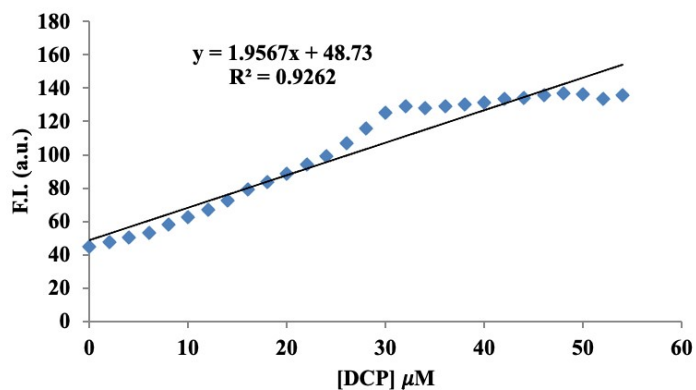

**Figure S5:** Plot for the determination of lowest detection limit of **HQHBI** ( $20\ \mu\text{M}$ ) with DCP in  $\text{H}_2\text{O}$ :  $\text{CH}_3\text{CN}$ , 1:1 [v/v].

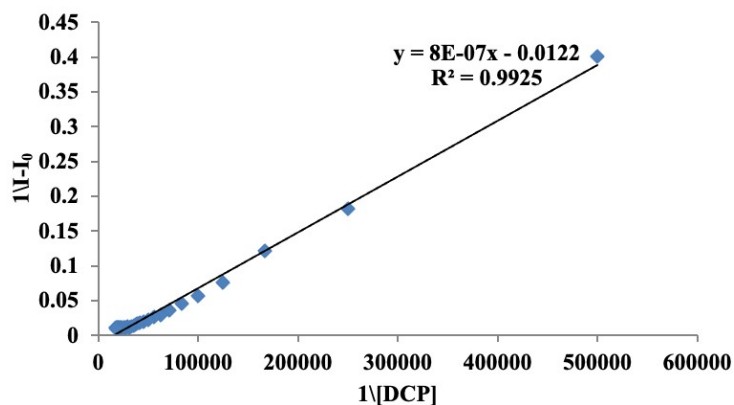

**Figure S6:** Benesi-Hildebrand plot for determination of binding constant of **HQHBI** ( $20\ \mu\text{M}$ ) with DCP in  $\text{H}_2\text{O}$ :  $\text{CH}_3\text{CN}$ , 1:1 [v/v].

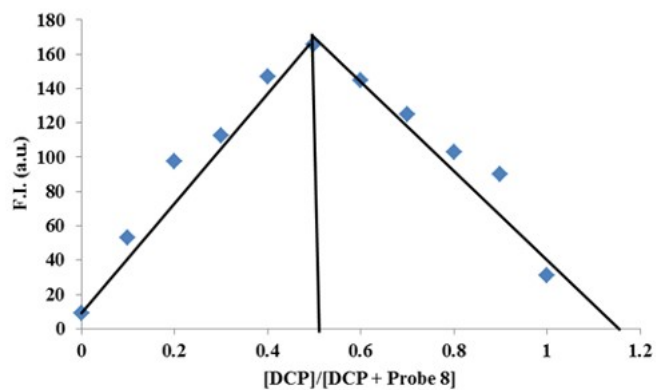

**Figure S7:** Job's Plot for **HQHBI** ( $20\ \mu\text{M}$ ) binding with DCP ( $20\ \mu\text{M}$ ) in  $\text{H}_2\text{O}$ :  $\text{CH}_3\text{CN}$ , 1:1 [v/v].

**Table S1:** Comparison with previously reported DCP sensors.

| S. No.: | Structure                                                                           | Solvent                                               | Selectivity | Limit of detection | References |
|---------|-------------------------------------------------------------------------------------|-------------------------------------------------------|-------------|--------------------|------------|
| 1       | 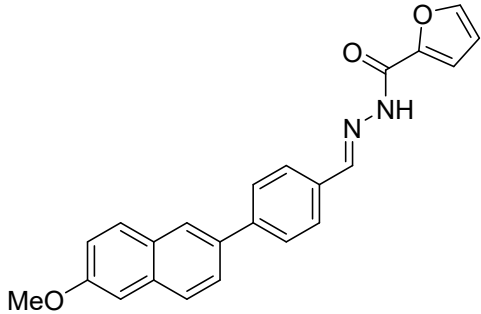   | CH <sub>3</sub> CN                                    | DCP         | 12.2 nM            | 1          |
| 2       |    | DMF                                                   | DCP         | 1.5 μM             | 2          |
| 3       |   | CH <sub>3</sub> CN                                    | DCP         | 24 nM              | 3          |
| 4       |  | CH <sub>3</sub> CN                                    | DCP         | 6.6 μM             | 4          |
| 5       |  | CH <sub>3</sub> CN                                    | DCP         | 20.9 μM            | 5          |
| 6       |  | H <sub>2</sub> O:<br>CH <sub>3</sub> CN,<br>1:1 [v/v] | DCP         | 0.15 μM            | This Work  |

1. S. Banerjee, P. Ghosh, A. Karak, D. Banik, and A. K. Mahapatra, A chemodosimetric chemosensor for the ratiometric detection of nerve agent-mimic DCP in solution and vapor phases, *Anal. Methods*, 2025, **17**, 432-439.
2. S.S.Ramasamy, K. Adhigaman, V. Nandakumar, A. Muralidharan, S. Ramasamy, and S. Thangaraj, Design and synthesis of 8-nitroquinoline azine D- $\pi$ -A module chemosensors: Fluorogenic onsite detection of sarin gas mimic-DCP, *Talanta Open*, 2025, **12**, 100508.
3. X. Wen, T. Jiang, T. Liu, B. Zhao, X. Xu, H. Jeong, C. Fan, Y. Sun, J. Yoon, and Z. Lu, Schiff base-based turn-on fluorescent probe for rapid on-site detection of nerve agent simulants in solution and vapor, *Microchem. J.*, 2026, **224**, 117473.
4. N. Tohora, C. Debnath, S. Ahamed, J. Chourasia, M. Mahato, S. Ali, S. Lama, S. Pradhan, and S. K. Das, An efficient ESIPT-based ratio-/fluorimetric probe for rapid and sensitive detection of the sarin surrogate diethylchlorophosphate in solution and vapor phases, *Anal. Methods*, 2025, **17**, 2067-2075.
5. A. D. Jaiswal, J. Chourasia, S. Ahamed, N. Tohora, S. Lama, M. Mahato, U. Darnal, S. Ghanta, and S. K. Das, Decrypting the mechanistic aspect of a fluorochromic diethylchlorophosphate sensitive benzimidazole based probe: A combined spectroscopic and theoretical investigation, *Microchem. J.*, 2025, **212**, 113421.
